# Supplementary figures and images for: ChIP-exo signal associated with DNA-binding motifs provides insight into the genomic binding of the glucocorticoid receptor and cooperating transcription factors
Source: HighWire-hosted journal article supplement (doi:10.1101/gr.185157.114), 2015-02-26

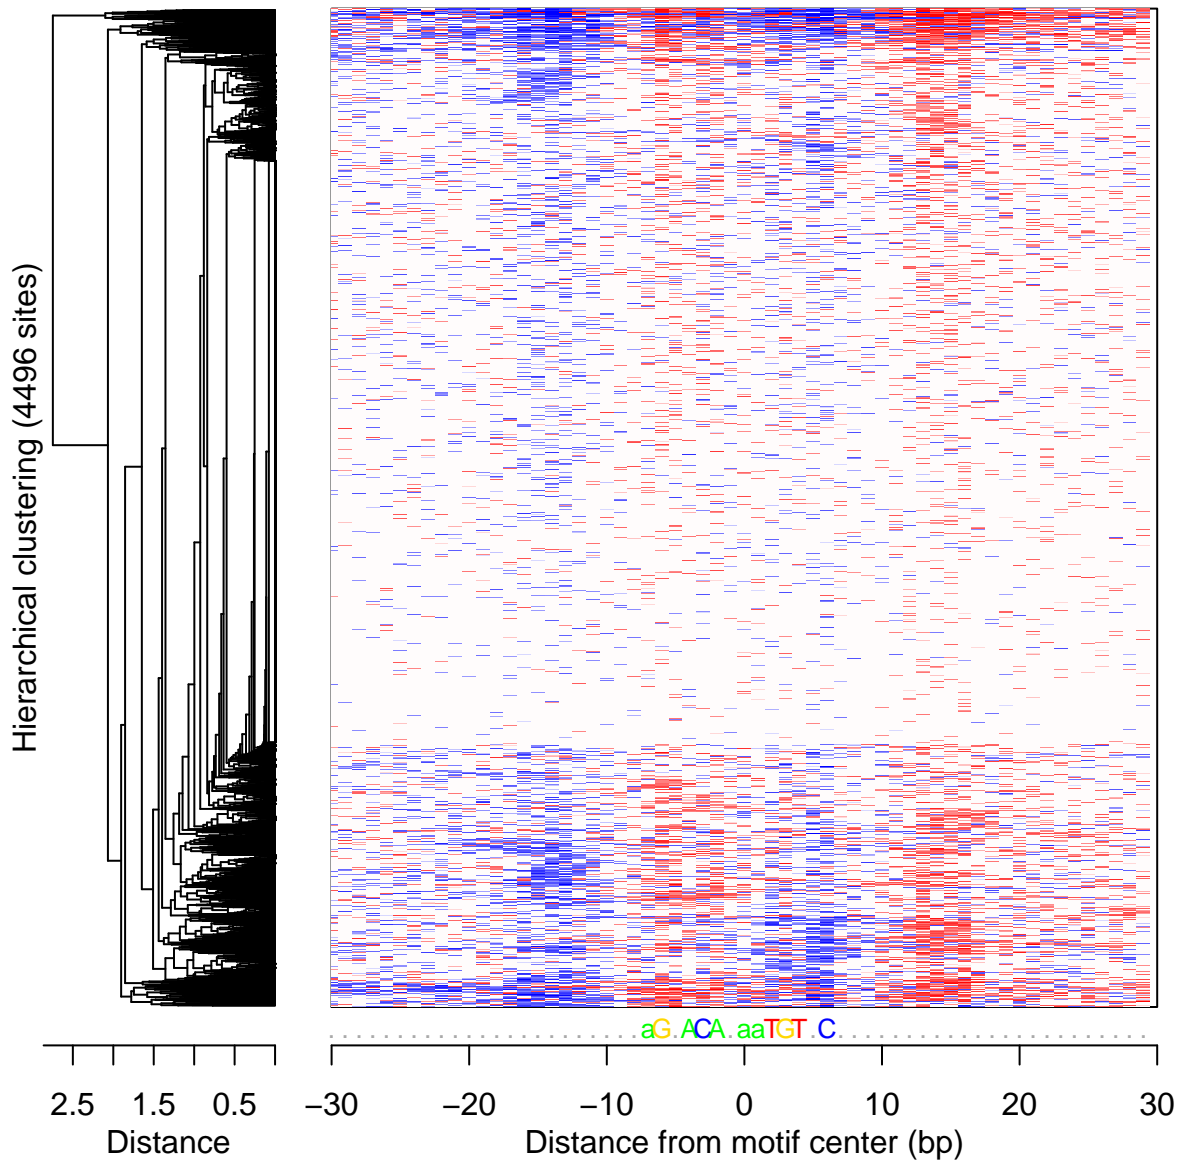

Supplement: ExoProfiler-master.zip [file output_exoprofiler_GR-MA0113-2_0-0001.cluster.pdf › ExoProfiler-master/example_result/output_exoprofiler_GR-MA0113-2_0-0001.cluster.pdf]

Binding sites ( n = 4496 )

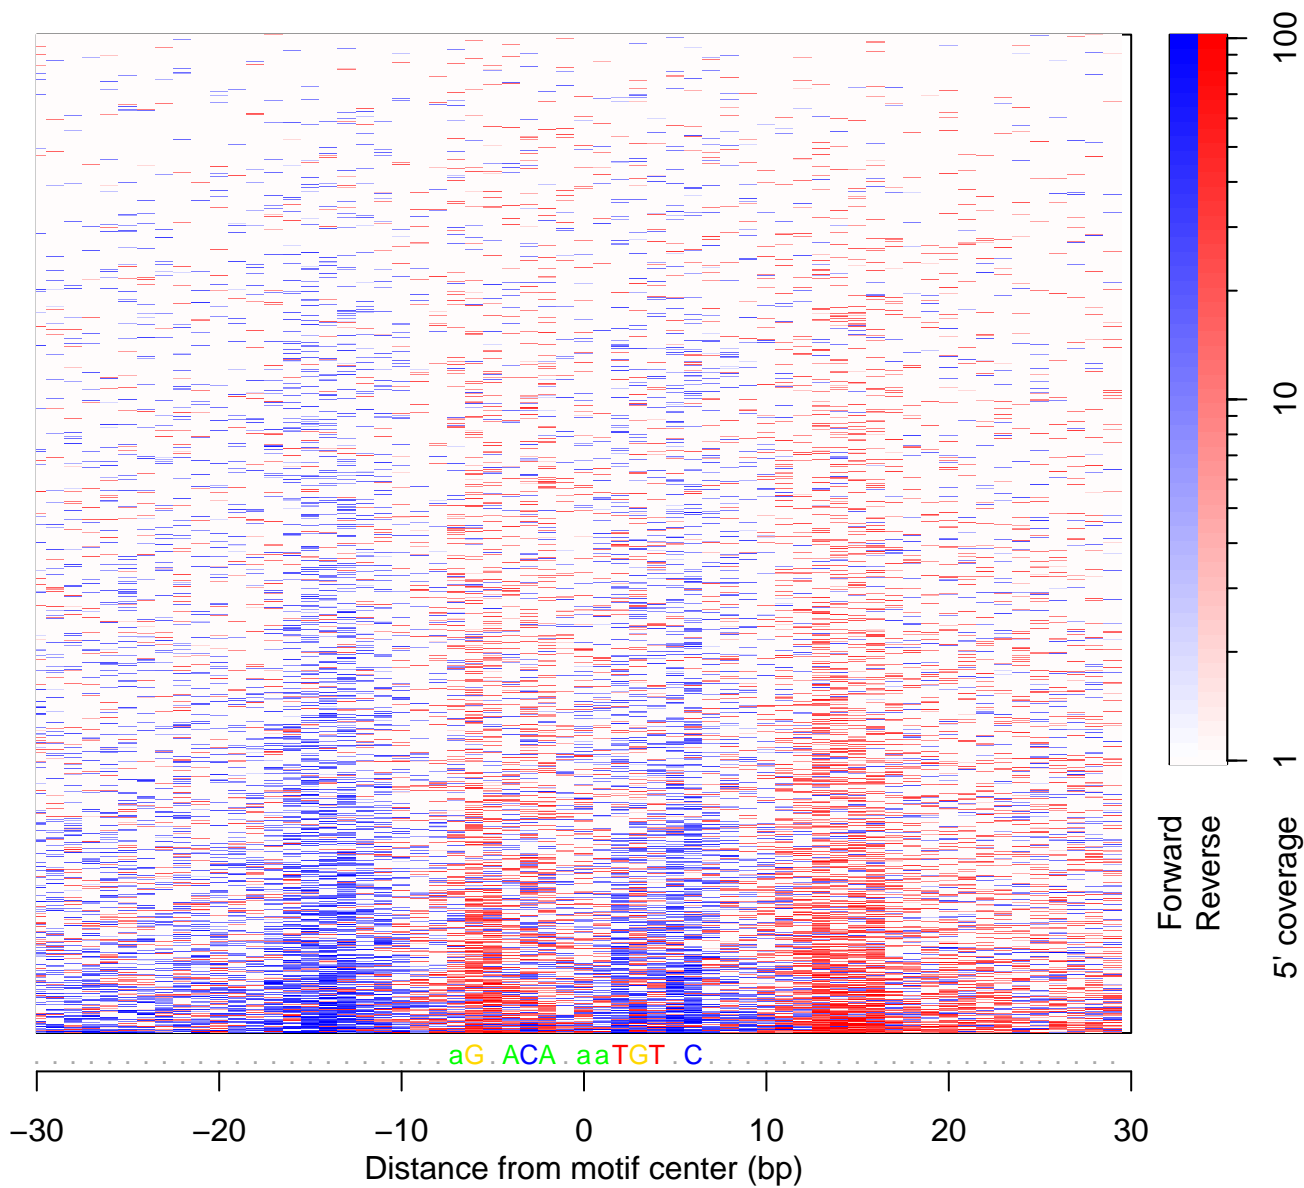

Supplement: ExoProfiler-master.zip [file output_exoprofiler_GR-MA0113-2_0-0001.maxstrand_heatmap.pdf › ExoProfiler-master/example_result/output_exoprofiler_GR-MA0113-2_0-0001.maxstrand_heatmap.pdf]

Forward      Permuted Fwd  
Reverse      Permuted Rev

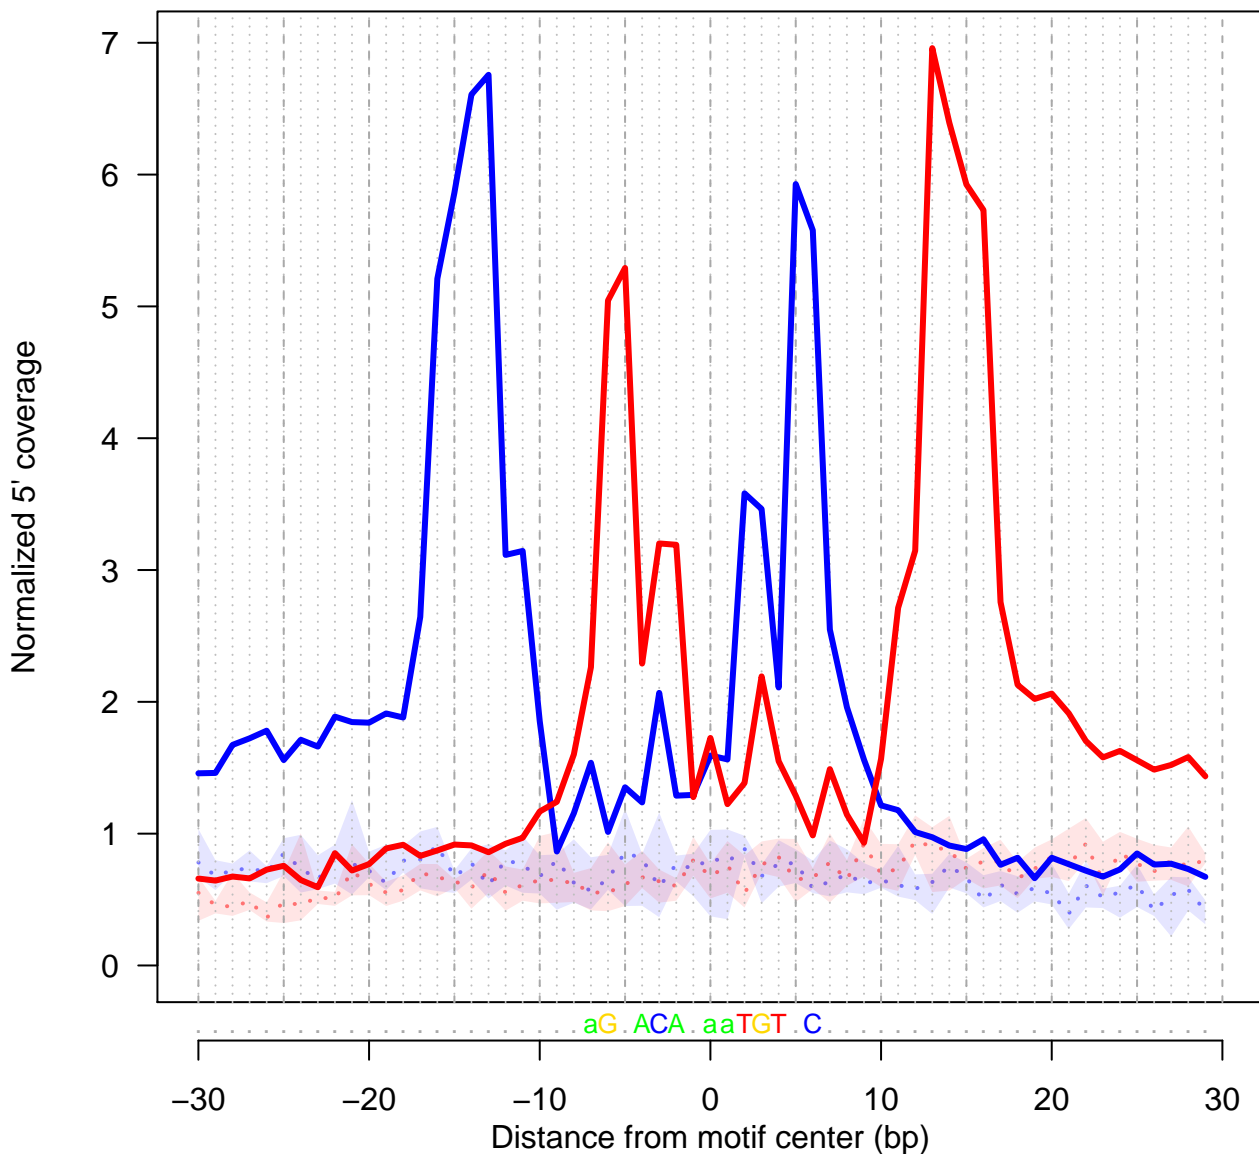

Supplement: ExoProfiler-master.zip [file output_exoprofiler_GR-MA0113-2_0-0001.profile-perm.pdf › ExoProfiler-master/example_result/output_exoprofiler_GR-MA0113-2_0-0001.profile-perm.pdf]

Forward Reverse

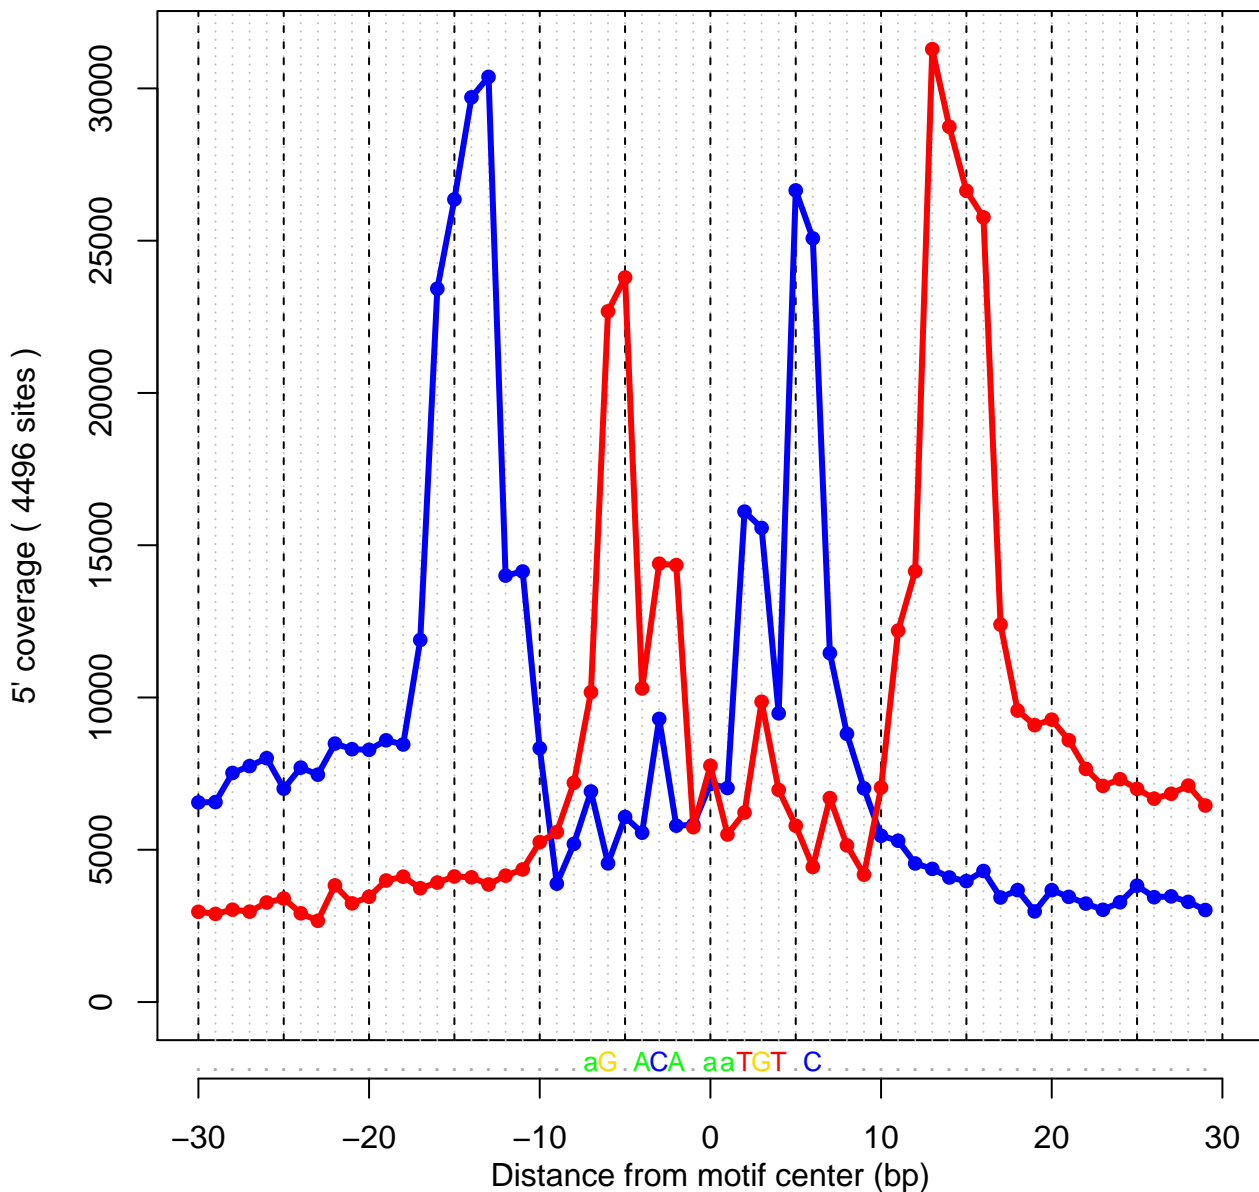

Supplement: ExoProfiler-master.zip [file output_exoprofiler_GR-MA0113-2_0-0001.profile.pdf › ExoProfiler-master/example_result/output_exoprofiler_GR-MA0113-2_0-0001.profile.pdf]

Binding sites ( n = 4496 )

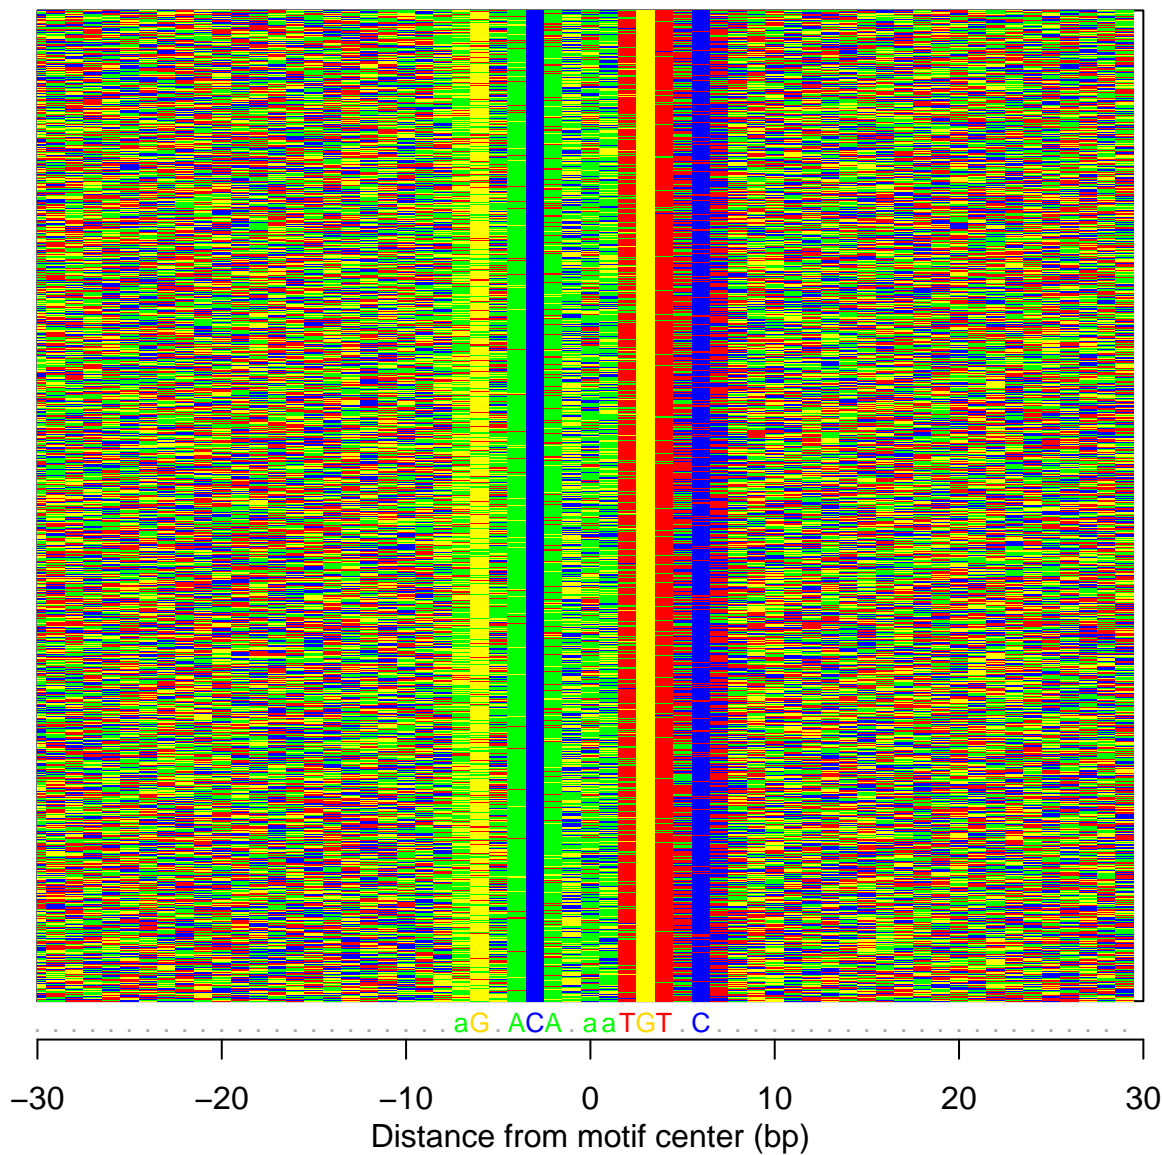

Supplement: ExoProfiler-master.zip [file output_exoprofiler_GR-MA0113-2_0-0001_seq.pdf › ExoProfiler-master/example_result/output_exoprofiler_GR-MA0113-2_0-0001_seq.pdf]
